# Supplementary material for: Dispersion-induced structural preference in the ultrafast dynamics of diphenyl ether
Source: Royal Society of Chemistry journal article supplement (doi:10.1039/d0ra02224a), 2020-01-01
Supplement: d0ra02224a1.pdf [file d0ra02224a1.pdf]

## Supplementary Information

### Dispersion-induced structural preference in the ultrafast dynamics of diphenyl ether

Lian Wang, Song Zhang\*, Ye Wang, Bing Zhang\*

*State Key Laboratory of Magnetic Resonance and Atomic and Molecular Physics, Innovation Academy for Precision Measurement Science and Technology, Chinese Academy of Sciences, Wuhan 430071, China*

*University of Chinese Academy of Sciences, Beijing 100049, China*

\*Address correspondence to: zhangsong@wipm.ac.cn and bzhang@wipm.ac.cn

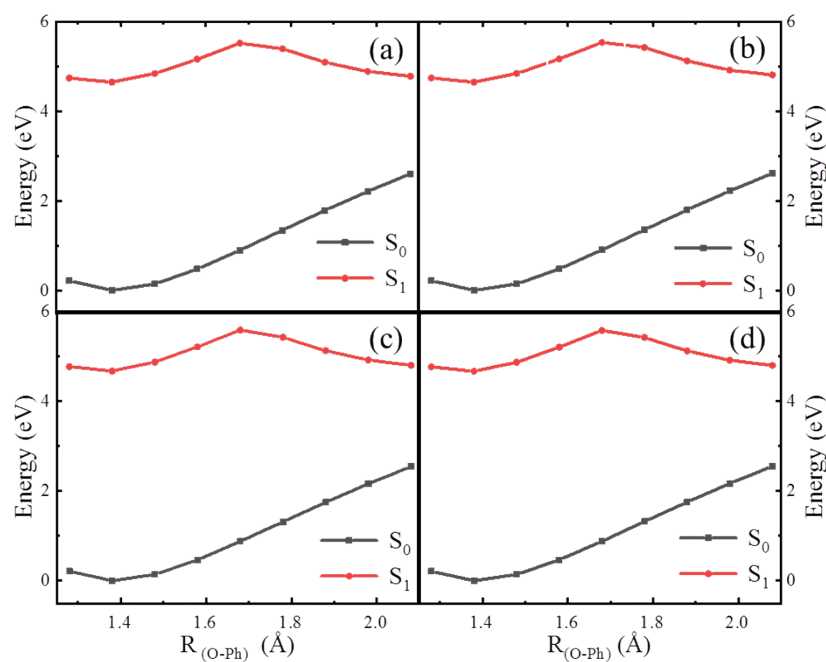

**Figure S1.** The potential curves of the two lowest states  $S_0$  and  $S_1$  of DPE in (a) cyclohexane, (b) 1,4-dioxane, (c) methanol and (d) t-butanol as a function of the O-Ph bond distance. The energies are relative to the minimum of the  $S_0$  curve.

**Table S1.** Vertical excitation energies of the  $S_1$  and  $T_n$  states using B3LYP/cc-pVDZ in cyclohexane, 1,4-dioxane, t-butanol and methanol, respectively.

| solvents    | Polarity | $E_{S_1}$ (eV) | $E_{T_n}$ (eV) | $E_{S_1 \rightarrow T_n}$ (eV) | Exp. $\cdot S_1$ (eV) |  |                     |
|-------------|----------|----------------|----------------|--------------------------------|-----------------------|--|---------------------|
| cyclohexane | 0        | 4.64           | T <sub>1</sub> | 3.60                           | 1.04                  |  |                     |
|             |          |                | T <sub>2</sub> | 3.73                           | 0.91                  |  |                     |
|             |          |                | T <sub>3</sub> | 4.08                           | 0.56                  |  |                     |
|             |          |                | T <sub>4</sub> | 4.32                           | 0.32                  |  |                     |
|             |          |                | T <sub>5</sub> | 4.44                           | 0.20                  |  |                     |
|             |          |                | T <sub>6</sub> | 4.56                           | 0.08                  |  |                     |
| 1,4-dioxane | 4.8      | 4.65           | T <sub>1</sub> | 3.60                           | 1.05                  |  |                     |
|             |          |                | T <sub>2</sub> | 3.73                           | 0.92                  |  |                     |
|             |          |                | T <sub>3</sub> | 4.08                           | 0.57                  |  |                     |
|             |          |                | T <sub>4</sub> | 4.32                           | 0.33                  |  |                     |
|             |          |                | T <sub>5</sub> | 4.44                           | 0.21                  |  |                     |
|             |          |                | T <sub>6</sub> | 4.56                           | 0.09                  |  | 4.45 $\pm$ 0.01 [1] |
| t-butanol   | 3.9      | 4.66           | T <sub>1</sub> | 3.61                           | 1.05                  |  |                     |
|             |          |                | T <sub>2</sub> | 3.74                           | 0.92                  |  | 4.55 $\pm$ 0.01 [2] |
|             |          |                | T <sub>3</sub> | 4.09                           | 0.57                  |  |                     |
|             |          |                | T <sub>4</sub> | 4.33                           | 0.33                  |  |                     |
|             |          |                | T <sub>5</sub> | 4.45                           | 0.21                  |  |                     |
|             |          |                | T <sub>6</sub> | 4.56                           | 0.10                  |  |                     |
| methanol    | 6.6      | 4.67           | T <sub>1</sub> | 3.61                           | 1.06                  |  |                     |
|             |          |                | T <sub>2</sub> | 3.74                           | 0.93                  |  |                     |
|             |          |                | T <sub>3</sub> | 4.10                           | 0.57                  |  |                     |
|             |          |                | T <sub>4</sub> | 4.33                           | 0.34                  |  |                     |
|             |          |                | T <sub>5</sub> | 4.45                           | 0.22                  |  |                     |
|             |          |                | T <sub>6</sub> | 4.56                           | 0.11                  |  |                     |

1. S. E. Greenough, M. D. Horbury, J. O. F. Thompson, G. M. Roberts, T. N. V. Karsili, B. Marchetti, D. Townsend, and V. G. Stavros. *Phys. Chem. Chem. Phys.*, 2014, **16**, 16187-16195.
2. T. Hinohara, S. Cho, and T. Morita. *Bull. Chem. Soc. Jpn.*, 1971, **44**, 629-637.
